# Supplementary material
Source: PubMed Central journal article supplement (PMC3977278)
Supplement: 1321364111_pnas.201321364SI.pdf [file 1321364111_pnas.201321364SI.pdf]

# Supporting Information

DeLeo et al. 10.1073/pnas.1321364111

## SI Materials and Methods

***Klebsiella pneumoniae* Isolates.** We selected two representative multilocus sequence type 258 (ST258) carbapenem-resistant *K. pneumoniae* isolates for genome sequencing based on the presence of KPC3 and mucoid and nonmucoid phenotypes. Isolates were selected for comparative genome sequencing based on their geographical and temporal distribution, *K. pneumoniae* carbapenemase (KPC) variants, and Tn4401 isoforms (Dataset S1). *K. pneumoniae* isolates were obtained from healthcare facilities at diverse geographic locations in the United States, Canada, Colombia, and Italy. None of the ST258 isolates contained the gene encoding New Delhi metallo- $\beta$ -lactamase-1 (Dataset S1). *K. pneumoniae* were cultured overnight in LB broth at 37 °C for subsequent isolation of DNA for genome sequencing (see below). Alternatively, bacteria were cultured overnight in LB and then were subcultured to exponential phase of growth in LB. Bacteria were pelleted by centrifugation to remove the medium and were opsonized with fresh 5% (vol/vol) human autologous serum for 30 min at 37 °C. Bacteria were washed once in PBS, suspended in RPMI/H to the desired concentration, and added to assay tubes with human neutrophils as described below.

**Characterization of *K. pneumoniae* Strains.** Minimum inhibitory concentrations of *K. pneumoniae* isolates were determined by broth microdilution in cation-adjusted Mueller–Hinton broth using Sensititre GNX2F panels (Thermo Fisher Scientific) according to Clinical and Laboratory Standards Institute methods and interpretations (1, 2). An in-house resistance and plasmid replicon database was developed. The resistance reference genes were identified from the Comprehensive Antibiotic Research Database (<http://arpcard.mcmaster.ca>) (3), Antibiotic Resistance Genes Database (<http://ardb.cbcb.umd.edu/>) (4), Lahey Clinic  $\beta$ -lactamase database ([www.lahey.org/studies/](http://www.lahey.org/studies/)), and published gene lists (5). The plasmid replicons were identified from plasmid multilocus sequence type databases (<http://pubmlst.org/plasmid/>), from the PCR-based replicon typing method (6), and from plasmids sequenced in the current study. All unique resistance and plasmid replicon sequences were concatenated and compiled as the reference library. The *cps* regions of two clades were also included in the library. The DNA sequence of the capsular polysaccharide biosynthesis gene cluster *cps 1* from isolate 1787 was generated by de novo assembly of the Illumina HiSeq reads using CLC Genomics Workbench software (v5.5.1, CLC Bio). The *cps 2* DNA sequence was determined from the genome sequence from NJST258\_1. The raw reads of each sample then were assembled against the library using CLC Genomics Workbench to identify genes encoding antimicrobial resistance (resistance to  $\beta$ -lactams, aminoglycosides, and quinolones), plasmid replicons, and *cps* gene types.

***K. pneumoniae* de Novo DNA Sequencing and Assembly.** *K. pneumoniae* DNA was isolated from overnight cultures using a DNeasy tissue kit (Qiagen) according to the manufacturer's directions. Paired end libraries with an 8-kb span were created for *K. pneumoniae* strains NJST258\_1 and NJST258\_2 using kits and reagents (Roche) according to the manufacturer's instructions, and each library was sequenced using a two-region gasket and 454 GS FLX Titanium chemistry using a Roche 454/Life Sciences GS FLX sequencer. Two additional fragment libraries were prepared using the same method and were sequenced in an identical fashion. For Illumina sequencing, two libraries were prepared using *TruSeq DNA Sample* prep kits and reagents (Illumina) following the low sample

(LS) protocol provided by the manufacturer. The libraries were pooled in equal amounts and were clustered in an individual lane of a paired-end flowcell, and 100 bp were sequenced from both ends using an Illumina HiSeq 2000 sequencer. De novo assembly was accomplished by using a combination of GS De Novo Assembler (Roche/454 Life Sciences), Mira (7), and Velvet (8). The best assemblies from each method were combined using Sequencher. These contigs were ordered by genome position and orientation using optical whole-genome mapping (OpGen) to create a complete scaffold with 27 or 37 gaps. Gap closures were accomplished using a combination of traditional Sanger sequencing or long-range PCR amplification of the gaps followed by sequencing and assembly using a Roche 454/Life Sciences GS FLX sequencer and GS De Novo Assembler. Genome annotation was performed by Integrated Genomics, as described previously (9). The genome and plasmid DNA sequences of NJST258\_1 and NJST258\_2 are deposited in GenBank under National Center for Biotechnology Information (NCBI) accession numbers CP006923 (NJST258\_1 chromosome), CP006927 (pNJST258N1), CP006926 (pNJST258N2), CP006925 (pNJST258N3), CP006928 (pNJST258N4), and CP006924 (pNJST258N5), and NCBI accession numbers CP006918 (NJST258\_2 chromosome), CP006922 (pNJST258C1), CP006919 (pNJST258C2), and CP006921 (pNJST258C3).

***K. pneumoniae* Comparative Genome Sequencing and Analysis.** Total DNA was isolated from overnight cultures of 85 *K. pneumoniae* clinical isolates using a DNeasy tissue kit (Qiagen) according to the manufacturer's directions. Samples were sheared individually on a Covaris S2 Focused-ultrasonicator (Covaris, Inc.) using the glass microtube format, stored in a 96-well plate, and processed using the LS protocol (Illumina). Samples were uniquely indexed to represent eight pools and were size selected on a Pippin Prep electrophoresis platform (Sage Science, Inc.). Each pool was clustered in an individual lane of a paired-end flowcell, and 50 bp were sequenced from both ends on an Illumina HiSeq 2000. Raw reads were trimmed and filtered for adaptor and poor-quality sequence. Reads were mapped to the genome of *K. pneumoniae* strain NJST258\_1 using Bowtie 2 (10), and SNPs and small indels were called using GATK Unified Genotyper (11). Metadata were deposited in the NCBI sequence read archive (SRA) ([www.ncbi.nlm.nih.gov/sra](http://www.ncbi.nlm.nih.gov/sra)) under the accession number SRP036874.

**Bioinformatics.** *K. pneumoniae* strains NJST258\_1 and NJST258\_2 were compared with eight other closed *K. pneumoniae* genomes currently in NCBI using the BLAST Ring Image Generator program (12). Phylogenetic analysis was performed using concatenated SNP sequences; SNPs located within a mobile genetic element were excluded. Concatenated SNP sequences were aligned using the MAFFT plugin for Geneious Pro (13). Phylogenetic trees were generated using the neighbor-joining method with the Tamura–Nei distance model (14), using isolate 1813 as an outgroup in some analyses, and were resampled 1,000 times with the bootstrap method in Geneious Pro.

**Human Neutrophil Assays.** Neutrophils were isolated from venous blood of healthy volunteers using dextran sedimentation coupled with Ficoll-Hypaque gradient density centrifugation as described previously (15). These studies were performed in accordance with a protocol approved by the Institutional Review Board for human subjects, National Institute of Allergy and Infectious Diseases, National Institutes of Health. All blood donors provided written informed consent before participation in the studies.

To measure neutrophil bactericidal activity, polymorphonuclear neutrophils (PMNs) in RPMI/H were combined with serum opsonized or unopsonized bacteria in 1.5-mL Eppendorf tubes ( $10^6$  PMN +  $10^6$  cfus *K. pneumoniae* in 600  $\mu$ L final volume; cfu:PMN ratio = 1:1) and were incubated at 37 °C for 1 h with gentle rotation. Saponin (0.1% final concentration) was added to each

tube, the contents were mixed, and the tubes were chilled on ice for 15 min before diluting and plating on LB. Cfus were enumerated the following day. Percent survival was determined with the following equation:  $\text{cfu}_{+PMN\ 60\ \text{min}}/\text{cfu}_{w/o\ PMN\ 60\ \text{min}} * 100$ . Data were analyzed using a one-way ANOVA and Tukey's posttest (GraphPad Prism 6.0b for Mac OS X, GraphPad Software).

- Clinical and Laboratory Standards Institute (2012) *Methods for Dilution Antimicrobial Susceptibility Tests for Bacteria That Grow Aerobically; Approved Standard* (CLSI, Wayne, PA), 9th Ed, pp M07–A9.
- Clinical and Laboratory Standards Institute (2013) *Performance standards for antimicrobial susceptibility testing. Twenty-third Informational supplement, M100-S23*. (CLSI, Wayne, PA).
- McArthur AG, et al. (2013) The comprehensive antibiotic resistance database. *Antimicrob Agents Chemother* 57(7):3348–3357.
- Liu B, Pop M (2009) ARDB—Antibiotic Resistance Genes Database. *Nucleic Acids Res* 37 (Database issue):D443–D447.
- van Hoek AH, et al. (2011) Acquired antibiotic resistance genes: An overview. *Front Microbiol* 2:203.
- Carattoli A, et al. (2005) Identification of plasmids by PCR-based replicon typing. *J Microbiol Methods* 63(3):219–228.
- Chevreur B, Wetter T, Suhai S (1999) Genome sequence assembly using trace signals and additional sequence information. *Computer Science and Biology: Proceedings of the German Conference on Bioinformatics GCB '99*, ed Wingender E (GBF-Braunschweig, Hannover, Germany), pp 45–56.
- Zerbino DR, Birney E (2008) Velvet: Algorithms for de novo short read assembly using de Bruijn graphs. *Genome Res* 18(5):821–829.
- Uhlemann AC, et al. (2012) Identification of a highly transmissible animal-independent *Staphylococcus aureus* ST398 clone with distinct genomic and cell adhesion properties. *MBio* 3(2):e00027–e12.
- Langmead B, Salzberg SL (2012) Fast gapped-read alignment with Bowtie 2. *Nat Methods* 9(4):357–359.
- McKenna A, et al. (2010) The Genome Analysis Toolkit: A MapReduce framework for analyzing next-generation DNA sequencing data. *Genome Res* 20(9):1297–1303.
- Alikhan NF, Petty NK, Ben Zakour NL, Beatson SA (2011) BLAST Ring Image Generator (BRIG): Simple prokaryote genome comparisons. *BMC Genomics* 12:402.
- Katoh K, Misawa K, Kuma K, Miyata T (2002) MAFFT: A novel method for rapid multiple sequence alignment based on fast Fourier transform. *Nucleic Acids Res* 30(14):3059–3066.
- Saitou N, Nei M (1987) The neighbor-joining method: A new method for reconstructing phylogenetic trees. *Mol Biol Evol* 4(4):406–425.
- Kobayashi SD, Voyich JM, Buhl CL, Stahl RM, DeLeo FR (2002) Global changes in gene expression by human polymorphonuclear leukocytes during receptor-mediated phagocytosis: Cell fate is regulated at the level of gene expression. *Proc Natl Acad Sci USA* 99(10): 6901–6906.

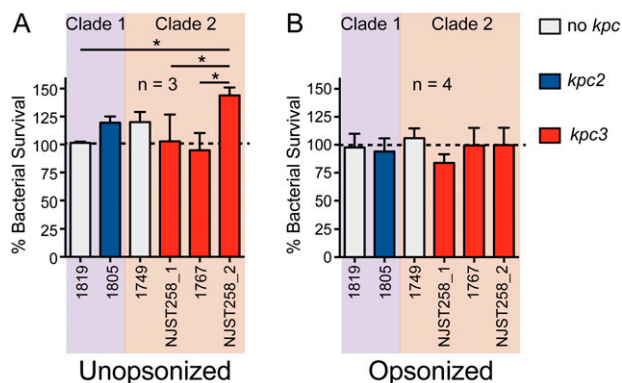

**Fig. S1.** Interaction of *K. pneumoniae* with human neutrophils. (A and B) Survival of the indicated *K. pneumoniae* isolates following phagocytic interaction with human neutrophils as described in *SI Materials and Methods*. Assays in A were performed with unopsonized bacteria; assays in B were performed with bacteria opsonized in 5% (vol/vol) human serum as indicated. Data are the mean  $\pm$  SD of three or four experiments (PMN donors) as indicated. Data were analyzed using a one-way ANOVA and Tukey's posttest. \* $P < 0.05$  for the indicated comparisons.

**Table S1. ST258 genes involved in antibiotic or heavy metal resistance**

| Gene/operon                 | Predicted function           | NJST258_1                                       | NJST258_2          |
|-----------------------------|------------------------------|-------------------------------------------------|--------------------|
| Chromosome                  |                              |                                                 |                    |
| <i>gyrA</i>                 | Quinolone resistance         | Ser83Ile, Asp87Gly                              | Ser83Ile, Asp87Asn |
| <i>gyrB</i>                 | Quinolone resistance         | WT                                              | WT                 |
| <i>parC</i>                 | Quinolone resistance         | Ser80Ile                                        | Ser80Ile           |
| <i>parE</i>                 | Quinolone resistance         | WT                                              | WT                 |
| <i>rpoB</i>                 | Rifampin resistance          | WT                                              | WT                 |
| <i>folp</i>                 | Sulfonamide resistance       | WT                                              | WT                 |
| <i>ompA</i>                 | Outer membrane protein       | WT                                              | WT                 |
| <i>ompK26</i>               | Outer membrane protein       | WT                                              | WT                 |
| <i>ompK35</i>               | Outer membrane protein       | STOP89                                          | STOP89             |
| <i>ompK36</i>               | Outer membrane protein       | WT                                              | WT                 |
| <i>ompK37</i>               | Outer membrane protein       | WT                                              | WT                 |
| <i>lamB</i>                 | Outer membrane protein       | +                                               | +                  |
| <i>phoE</i>                 | Outer membrane protein       | +                                               | +                  |
| <i>arcRAB</i>               | Multidrug efflux pump        | +                                               | +                  |
| <i>tolC</i>                 | Multidrug efflux pump        | +                                               | +                  |
| <i>oqxAB</i>                | Multidrug efflux pump        | +                                               | +                  |
| <i>rob</i>                  | Transcription factor         | +                                               | +                  |
| <i>marARC</i>               | Transcription factor         | <i>marA</i> -, <i>marR</i> trunc, <i>marC</i> + | +                  |
| <i>soxRS</i>                | Transcription factor         | <i>soxR</i> -, <i>soxS</i> trunc                | +                  |
| <i>romAR</i>                | Transcription factor         | +                                               | —                  |
| <i>hfg</i>                  | RNA-binding protein          | +                                               | +                  |
| <i>scrYAB</i>               | Sucrose-specific porin       | +                                               | +                  |
| <i>rpoS</i>                 | RNA polymerase sigma factor  | +                                               | +                  |
| <i>pagP</i>                 | Lipid A acylation protein    | +                                               | +                  |
| <i>phoBR</i>                | TCS                          | +                                               | +                  |
| <i>phoPQ</i>                | TCS                          | +                                               | +                  |
| <i>pmrAB</i>                | TCS                          | +                                               | +                  |
| <i>pmrD</i>                 | Signal transduction protein  | +                                               | +                  |
| <i>pmrF</i>                 | Lipid A biosynthesis protein | +                                               | +                  |
| <i>rscCBD</i>               | TCS                          | +                                               | +                  |
| <i>bla<sub>SHV-11</sub></i> | β-Lactam resistance          | —                                               | +                  |
| Plasmid                     |                              |                                                 |                    |
| <i>bla<sub>KPC-3</sub></i>  | β-Lactam resistance          | +                                               | +                  |
| <i>bla<sub>TEM-1</sub></i>  | β-Lactam resistance          | +                                               | trunc              |
| <i>bla<sub>OXA-9</sub></i>  | β-Lactam resistance          | +                                               | —                  |
| <i>aacA4</i>                | Aminoglycoside resistance    | +                                               | +                  |
| <i>aadA1</i>                | Aminoglycoside resistance    | +                                               | trunc              |
| <i>strAB</i>                | Aminoglycoside resistance    | +                                               | —                  |
| <i>dfrA14</i>               | Trimethoprim resistance      | +                                               | —                  |
| <i>sul2</i>                 | Sulfonamide resistance       | +                                               | —                  |
| <i>ars operon</i>           | Arsenic resistance           | +                                               | —                  |
| <i>cop operon</i>           | Copper resistance            | +                                               | —                  |
| <i>sil operon</i>           | Silver resistance            | +                                               | —                  |
| <i>nic operon</i>           | Nickel resistance            | +                                               | —                  |

Where a specific mutation is listed, the amino acid changed caused antibiotic resistance. TCS, two-component gene regulatory system; trunc, truncated gene; WT, wild-type allele (and thus the isolate was susceptible to the antibiotic); +, gene is present; —, gene is absent.

## Other Supporting Information Files

[Dataset S1 \(XLSX\)](#)

[Dataset S2 \(XLSX\)](#)

[Dataset S3 \(XLSX\)](#)
